# Supplementary material for: Metabolomics to Exploit the Primed Immune System of Tomato Fruit
Source: MDPI journal article supplement (doi:10.3390/metabo10030096), 2020-03-06
Supplement: s1 [file s1]

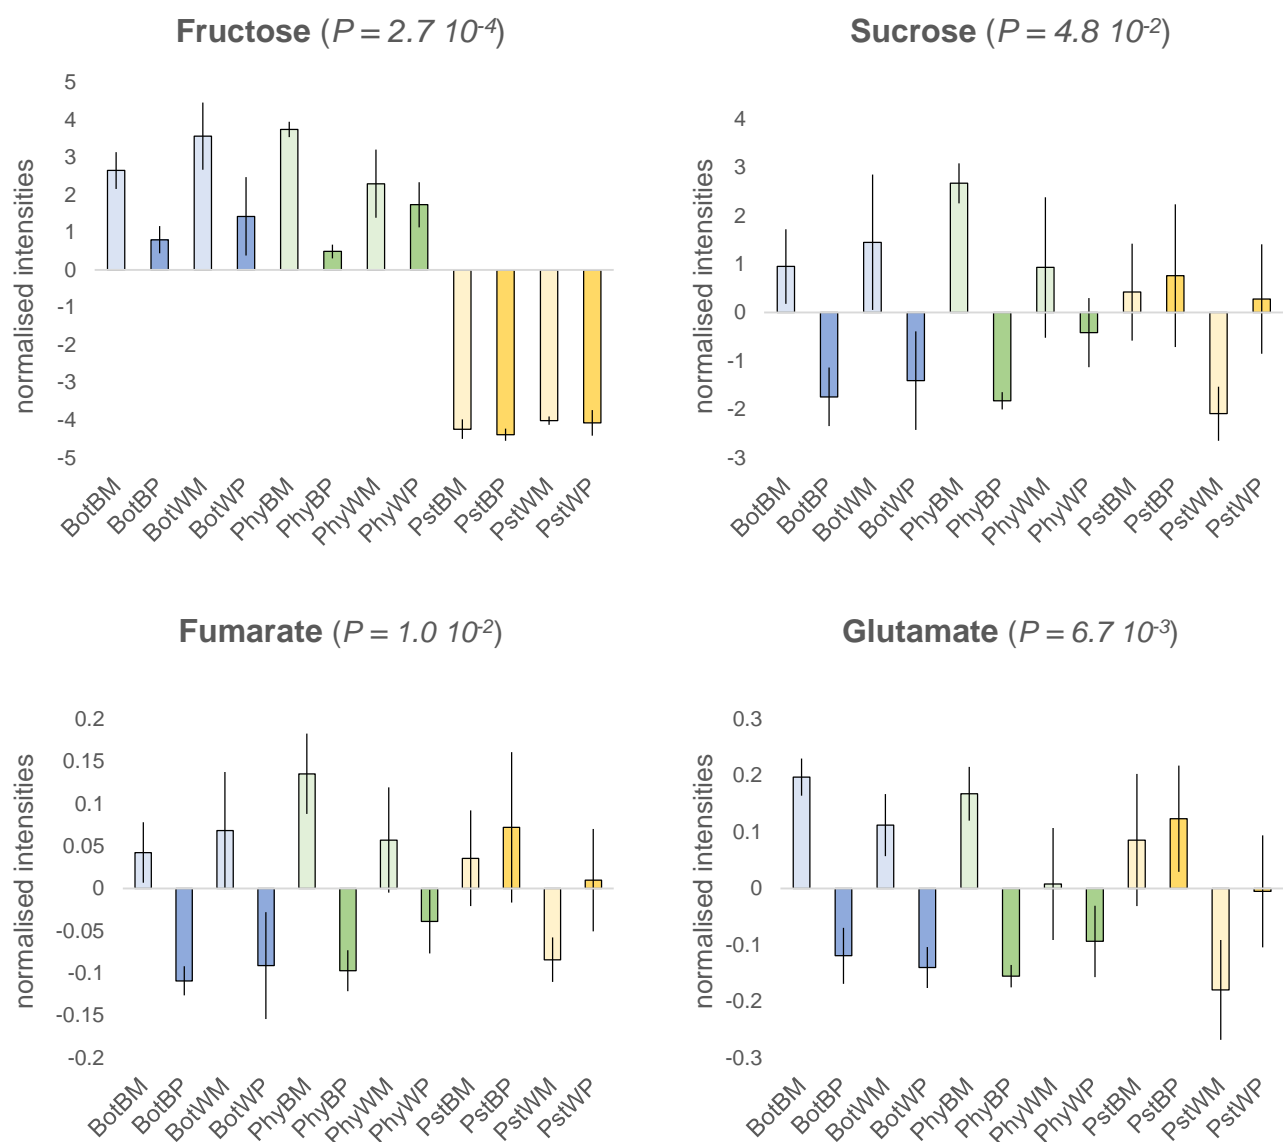

**Figure S1. Inoculation responsive central metabolites.** Major compounds involved in central metabolism statistically responded to the inoculation factor of a two-factor ANOVA ( $P$  given into brackets). Bar charts indicate means of normalised intensities of 4 independent bioreplicates ( $n = 4$ ;  $\pm$  SEM). Bot: *Botrytis cinerea*, Phy: *Phytophthora infestans*, Pst: *Pseudomonas syringae* pv. *tomato*, B: BABA-treated plants, W: water-treated plants, M: mock-inoculated fruit, P: pathogen-inoculated fruit.

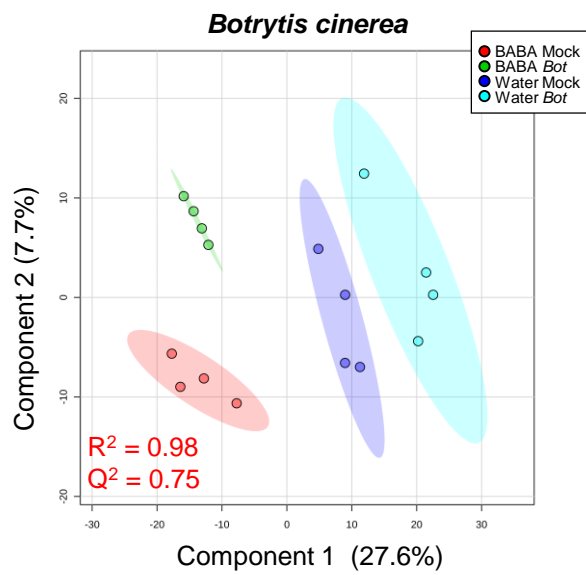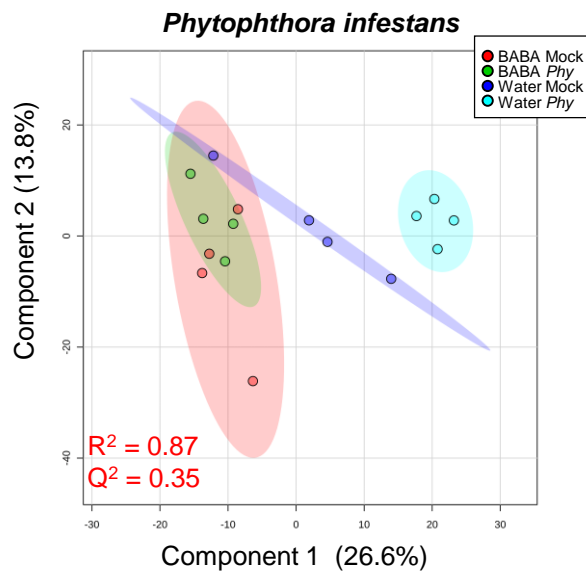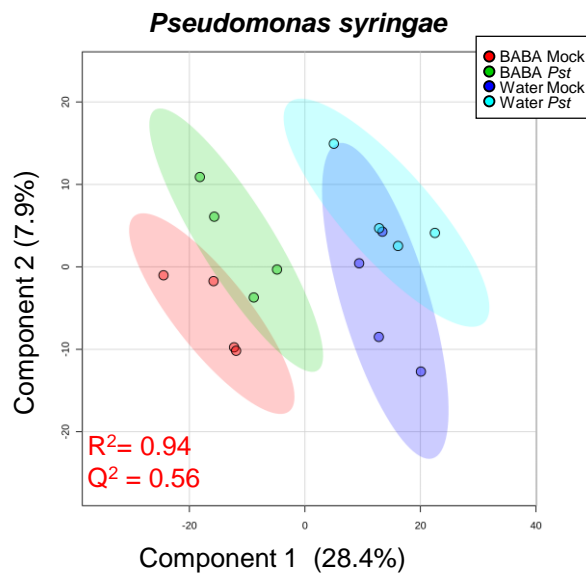

**Figure S2. Partial least square discriminant analysis for each pathosystem.** PLS-DA score plots ( $n = 4$ ) of 6,898 features (6,887 LCMS variables + 11 major compounds) between the three different pathosystems. Validation parameters of the PLS model are given in red for each plot.

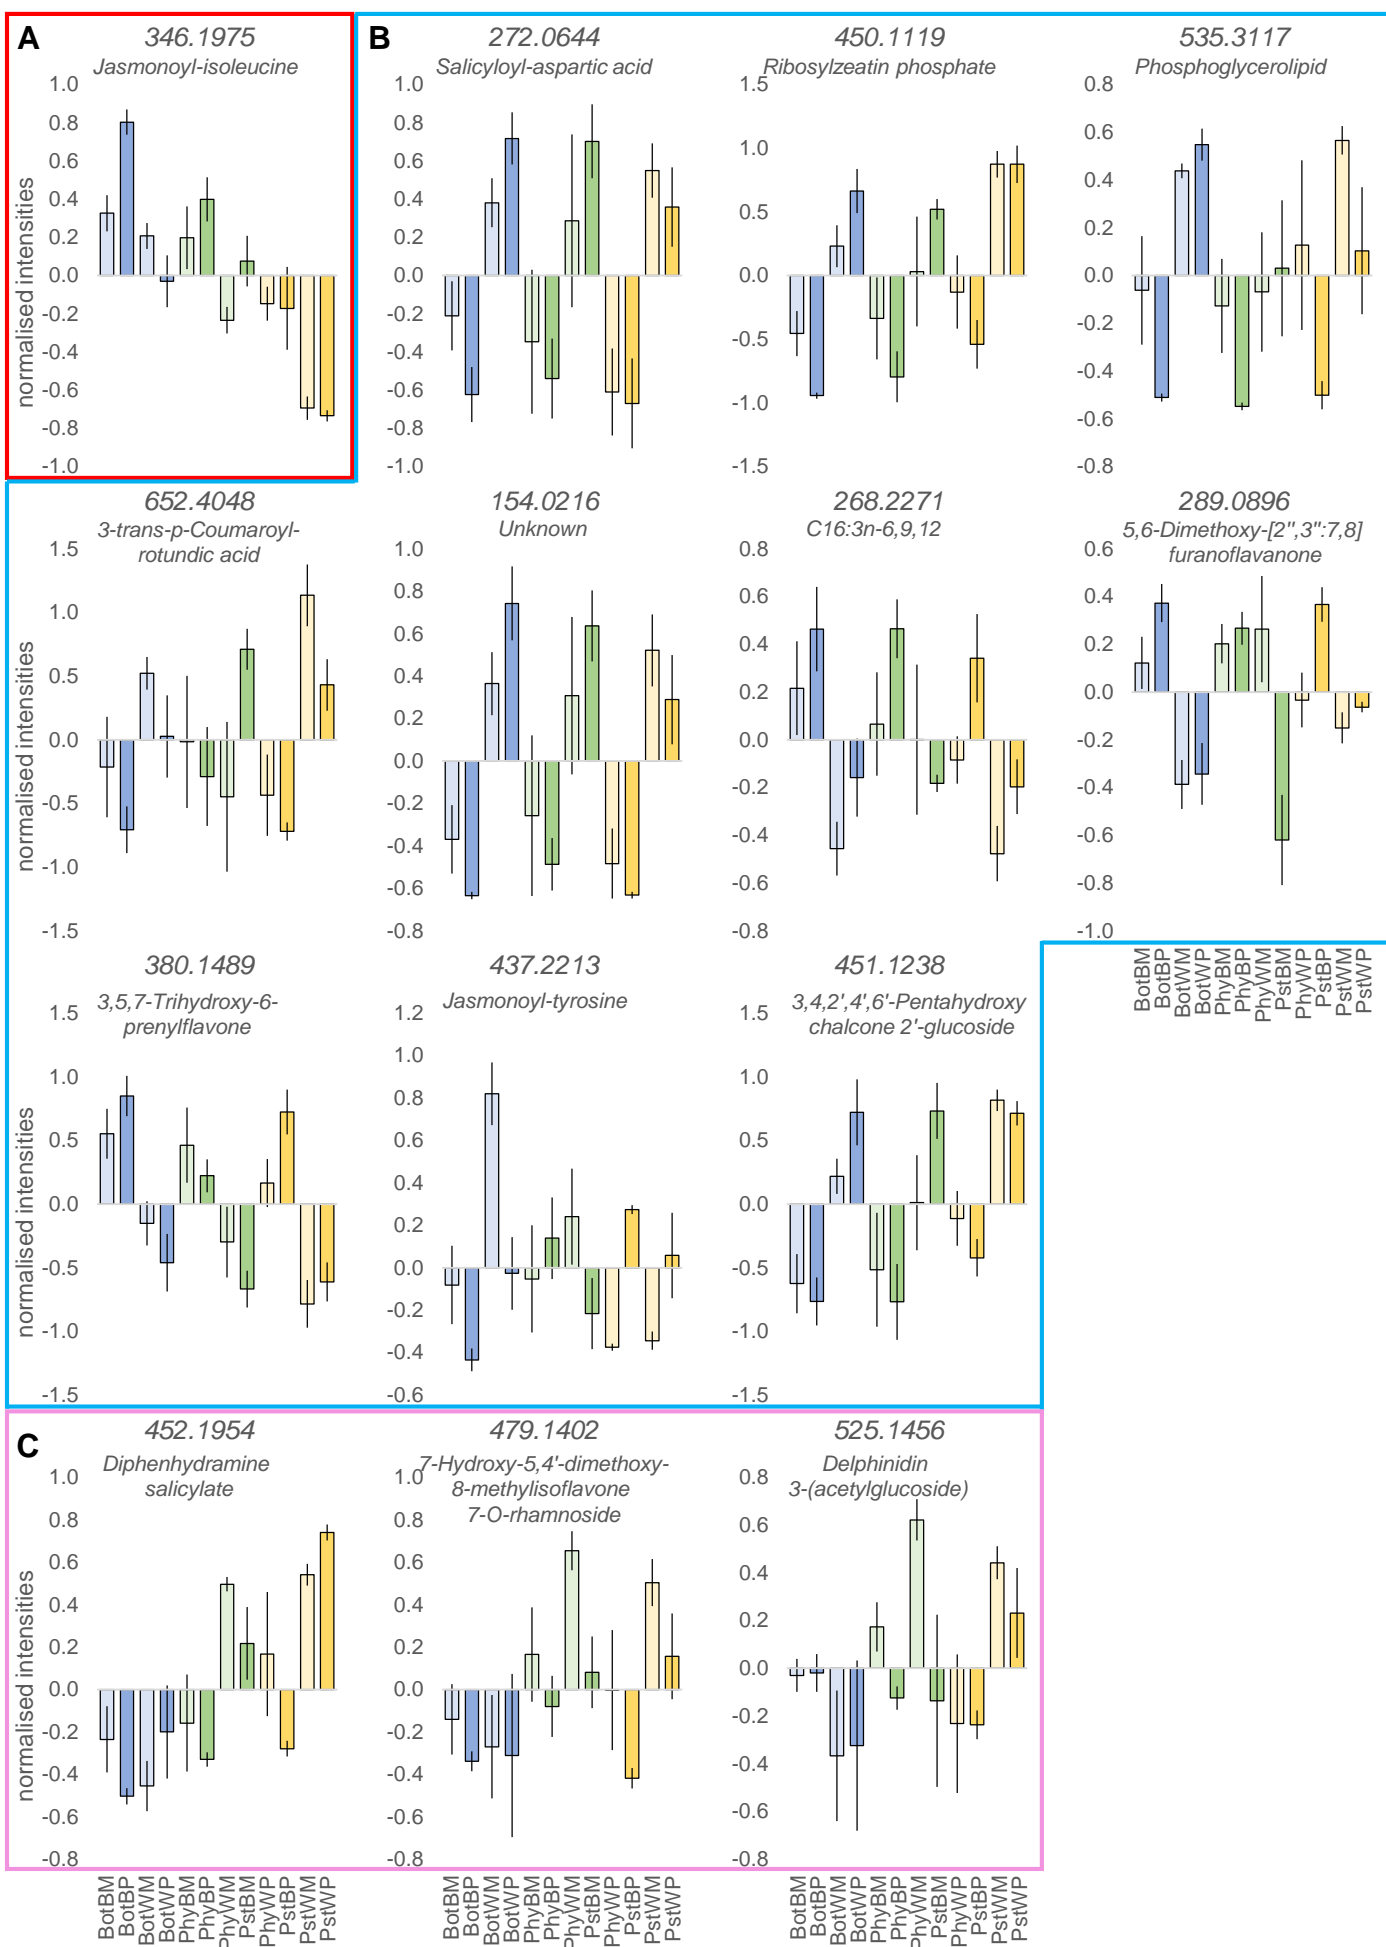

**Figure S3. Metabolic markers for BABA primed responses against fruit pathogens.** LCMS significant markers that overlap between *Bot* and *Phy* (A), *Bot* and *Pst* (B) and *Phy* and *Pst* (C) in response to BABA priming and after infection (see Table 3). Markers are labelled according to their high-resolution detected  $m/z$ . Bar charts indicate means of normalised intensities ( $n = 4$ ;  $\pm$  SEM). See Figure S1 for sample labels.
